# Supplementary material for: Gliding toward an understanding of the origin of flight in bats
Source: PeerJ journal article supplement (doi:10.7717/peerj.17824), 2024-07-25
Supplement: Data_S1_97250.pdf [file Data_S1_97250.pdf]

Supplementary Information for  
**Gliding towards an understanding of the origin of flight in bats**

This PDF file includes:

**Supplementary Results**

Figure S1: PCA with fossil and extant species of interest labeled.

Table S1: Loadings for forelimb and hind limb PCAs with extant mammals and extinct bats.

Table S2: Statistical results for OUM model fitting analyses on the extant-only dataset.

Table S3: Optima and bootstrapping results for best-supported OUM model.

Table S4: Statistical results for OUM model fitting analyses on the extant+extinct dataset.

Table S5: Optima values for the best-fitting OUM model results for extant+extinct dataset.

Table S6: Fits of multivariate evolutionary models to extant+extinct dataset.

**Other supplementary materials for this manuscript**

Data File S1: Morphological dataset for 231 mammal species and 4 extinct bats (.csv file).

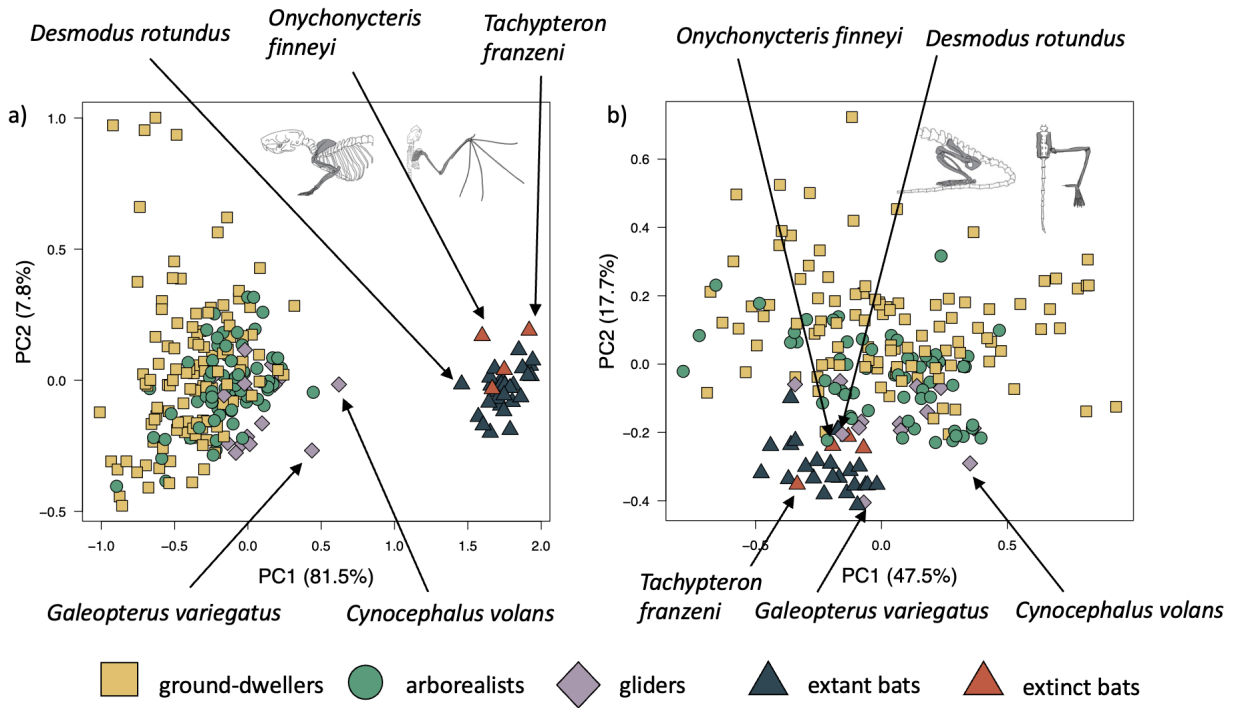

**Figure S1: PCA with fossil and extant species of interest labeled.** Morphospaces consisting of PCs 1 and 2 of our extant and extinct species' forelimb dataset for a) forelimbs and b) hind limbs with arrows pointing to the dermopteran species *Galeopterus variegatus* and *Cynocephalus volans*; the common vampire bat *Desmodus rotundus*; the most post-cranially primitive fossil bat, *Onychonycteris finneyi*; and *Tachypteron franzeni*, the only extinct species included in this study that is hypothesized to be part of an extant bat family. All figure components were created by the authors.

**Table S1: Loadings for forelimb and hind limb PCAs with extant mammals and extinct bats.** Principal component analysis loadings for our a) 14 forelimb traits and b) 10 hind limb traits (pes were excluded due to insufficient data). The five most extreme loadings are bolded for PC1 and PC2.

| a) forelimb traits                    | component loadings |              |               |
|---------------------------------------|--------------------|--------------|---------------|
|                                       | PC1                | PC2          | PC3           |
| scapula length (sl)                   | 0.056              | 0.186        | 0.079         |
| scapula height (sh)                   | 0.099              | 0.174        | <b>0.258</b>  |
| humerus length (hl)                   | <b>0.212</b>       | 0.046        | -0.076        |
| humerus shaft width (hsw)             | 0.088              | <b>0.342</b> | -0.186        |
| humerus proximal width (hpw)          | 0.085              | 0.259        | 0.000         |
| humerus distal width (hdw)            | 0.045              | <b>0.344</b> | <b>-0.273</b> |
| ulna length (ul)                      | 0.256              | 0.021        | -0.089        |
| ulna olecranon length (uol)           | -0.066             | <b>0.394</b> | <b>0.329</b>  |
| radius length (rl)                    | <b>0.300</b>       | -0.064       | -0.115        |
| 3rd metacarpal length (mcl)           | <b>0.518</b>       | -0.135       | <b>0.703</b>  |
| 3rd metacarpal width (mcw)            | 0.068              | <b>0.452</b> | 0.142         |
| 3rd proximal phalanx length (ppl)     | <b>0.447</b>       | -0.118       | -0.183        |
| 3rd proximal phalanx width (ppw)      | 0.004              | <b>0.483</b> | -0.017        |
| 3rd intermediate phalanx length (ipl) | <b>0.540</b>       | 0.044        | <b>-0.367</b> |
| <b>proportion explained (%)</b>       | 81.5               | 7.8          | 2.9           |

  

| b) hind limb traits  | PC1   | PC2          | PC3          |
|----------------------|-------|--------------|--------------|
| pelvis length (pel)  | 0.188 | 0.189        | 0.262        |
| ilium length (il)    | 0.151 | 0.083        | <b>0.341</b> |
| ischium length (isl) | 0.250 | <b>0.357</b> | 0.180        |

|                                              |              |               |               |
|----------------------------------------------|--------------|---------------|---------------|
| femur length (fl)                            | 0.171        | -0.25         | <b>0.331</b>  |
| femur shaft width (fsw)                      | 0.131        | 0.184         | 0.182         |
| femur distal width (fdw)                     | 0.141        | 0.164         | 0.124         |
| tibia length (tl)                            | 0.272        | -0.257        | 0.239         |
| tibia proximal width (tpw)                   | 0.151        | 0.141         | 0.091         |
| tibia midshaft width (tmw)                   | 0.235        | 0.134         | 0.118         |
| fibula length (fbl)                          | <b>0.301</b> | -0.204        | <b>0.299</b>  |
| 3rd metatarsal length (mtl)                  | <b>0.475</b> | 0.088         | -0.211        |
| 3rd metatarsal width (mtw)                   | <b>0.335</b> | <b>0.282</b>  | <b>-0.448</b> |
| 3rd pedal proximal phalanx length (ppxl)     | <b>0.310</b> | <b>-0.378</b> | -0.074        |
| 3rd pedal proximal phalanx width (ppxw)      | 0.218        | <b>0.295</b>  | -0.273        |
| 3rd intermediate pedal phalanx length (ipxl) | <b>0.297</b> | <b>-0.494</b> | <b>-0.362</b> |
| <b>proportion explained (%)</b>              | 47.5         | 17.8          | 11.3          |

---

**Table S2: Statistical results for OUM model fitting analyses on the extant-only dataset.** Comparisons of the best-fitting OUM models (bolded) using AICc scores to assess fit and AICcW weights to assess relative model support for a) 14 forelimb traits and b) 15 hind limb traits. All models were fit using functions in the *OUwie R* package. Trait abbreviations are explained in table S1.

**a. forelimb**

| sl                         | fit            | delta       | w           | sh                         | fit            | delta       | w           | hl                         | fit            | delta       | w           |
|----------------------------|----------------|-------------|-------------|----------------------------|----------------|-------------|-------------|----------------------------|----------------|-------------|-------------|
| BM1                        | -382.99        | 134.24      | 0.00        | BM1                        | -304.60        | 92.15       | 0.00        | BM1                        | -418.82        | 89.49       | 0.00        |
| OU1                        | -501.85        | 15.39       | 0.00        | OU1                        | -368.87        | 27.88       | 0.00        | OU1                        | -430.16        | 78.15       | 0.00        |
| OUM <sub>loc3a</sub>       | -510.78        | 6.45        | 0.02        | OUM <sub>loc3a</sub>       | -376.88        | 19.87       | 0.00        | OUM <sub>loc3a</sub>       | -503.40        | 4.91        | 0.08        |
| <b>OUM<sub>loc3b</sub></b> | <b>-517.24</b> | <b>0.00</b> | <b>0.49</b> | OUM <sub>loc3b</sub>       | -394.81        | 1.95        | 0.19        | OUM <sub>loc3b</sub>       | -493.66        | 14.66       | 0.00        |
| OUM <sub>loc3c</sub>       | -516.17        | 1.07        | 0.28        | OUM <sub>loc3c</sub>       | -395.61        | 1.14        | 0.29        | OUM <sub>loc3c</sub>       | -491.74        | 16.57       | 0.00        |
| OUM <sub>loc4</sub>        | -515.57        | 1.67        | 0.21        | <b>OUM<sub>loc4</sub></b>  | <b>-396.75</b> | <b>0.00</b> | <b>0.51</b> | <b>OUM<sub>loc4</sub></b>  | <b>-508.31</b> | <b>0.00</b> | <b>0.92</b> |
| hdw                        | fit            | delta       | w           | hsw                        | fit            | delta       | w           | hpw                        | fit            | delta       | w           |
| BM1                        | -395.19        | 43.43       | 0.00        | BM1                        | -350.21        | 82.77       | 0.00        | BM1                        | -451.41        | 94.80       | 0.00        |
| OU1                        | -435.24        | 3.38        | 0.07        | OU1                        | -410.29        | 22.69       | 0.00        | OU1                        | -511.63        | 34.59       | 0.00        |
| OUM <sub>loc3a</sub>       | -438.61        | 0.01        | 0.36        | OUM <sub>loc3a</sub>       | -426.30        | 6.69        | 0.02        | OUM <sub>loc3a</sub>       | -527.98        | 18.23       | 0.00        |
| <b>OUM<sub>loc3b</sub></b> | <b>-438.62</b> | <b>0.00</b> | <b>0.36</b> | <b>OUM<sub>loc3b</sub></b> | <b>-432.98</b> | <b>0.00</b> | <b>0.65</b> | <b>OUM<sub>loc3b</sub></b> | <b>-546.21</b> | <b>0.00</b> | <b>0.40</b> |
| OUM <sub>loc3c</sub>       | -434.91        | 3.71        | 0.06        | OUM <sub>loc3c</sub>       | -424.81        | 8.17        | 0.01        | OUM <sub>loc3c</sub>       | -545.50        | 0.72        | 0.28        |
| OUM <sub>loc4</sub>        | -436.91        | 1.71        | 0.15        | OUM <sub>loc4</sub>        | -431.55        | 1.44        | 0.32        | OUM <sub>loc4</sub>        | -545.77        | 0.44        | 0.32        |
| rl                         | fit            | delta       | w           | ul                         | fit            | delta       | w           | uol                        | fit            | delta       | w           |
| BM1                        | -369.45        | 85.45       | 0.00        | BM1                        | -410.89        | 113.68      | 0.00        | BM1                        | -272.40        | 73.47       | 0.00        |
| OU1                        | -368.87        | 86.03       | 0.00        | OU1                        | -414.76        | 109.80      | 0.00        | OU1                        | -317.22        | 28.65       | 0.00        |
| OUM <sub>loc3a</sub>       | -442.25        | 12.66       | 0.00        | OUM <sub>loc3a</sub>       | -498.02        | 26.54       | 0.00        | <b>OUM<sub>loc3a</sub></b> | <b>-345.87</b> | <b>0.00</b> | <b>0.58</b> |
| OUM <sub>loc3b</sub>       | -437.74        | 17.17       | 0.00        | OUM <sub>loc3b</sub>       | -506.08        | 18.49       | 0.00        | OUM <sub>loc3b</sub>       | -342.30        | 3.57        | 0.10        |
| OUM <sub>loc3c</sub>       | -441.09        | 13.81       | 0.00        | OUM <sub>loc3c</sub>       | -509.29        | 15.28       | 0.00        | OUM <sub>loc3c</sub>       | -331.90        | 13.97       | 0.00        |
| <b>OUM<sub>loc4</sub></b>  | <b>-454.91</b> | <b>0.00</b> | <b>1.00</b> | <b>OUM<sub>loc4</sub></b>  | <b>-524.57</b> | <b>0.00</b> | <b>1.00</b> | OUM <sub>loc4</sub>        | -344.71        | 1.16        | 0.32        |
| mcl                        | fit            | delta       | w           | mew                        | fit            | delta       | w           | ppl                        | fit            | delta       | w           |
| BM1                        | -307.39        | 55.35       | 0.00        | BM1                        | -313.12        | 40.58       | 0.00        | BM1                        | -308.03        | 81.41       | 0.00        |

|                            |                |             |             |                            |                |             |             |                           |                |             |             |
|----------------------------|----------------|-------------|-------------|----------------------------|----------------|-------------|-------------|---------------------------|----------------|-------------|-------------|
| OU1                        | -305.34        | 57.40       | 0.00        | OU1                        | -351.03        | 2.67        | 0.11        | OU1                       | -306.13        | 83.31       | 0.00        |
| OUM <sub>loc3a</sub>       | -333.09        | 29.64       | 0.00        | OUM <sub>loc3a</sub>       | -348.07        | 5.64        | 0.03        | OUM <sub>loc3a</sub>      | -366.98        | 22.45       | 0.00        |
| OUM <sub>loc3b</sub>       | -359.99        | 2.75        | 0.16        | <b>OUM<sub>loc3b</sub></b> | <b>-353.70</b> | <b>0.00</b> | <b>0.44</b> | OUM <sub>loc3b</sub>      | -386.09        | 3.35        | 0.16        |
| <b>OUM<sub>loc3c</sub></b> | <b>-362.74</b> | <b>0.00</b> | <b>0.63</b> | OUM <sub>loc3c</sub>       | -352.06        | 1.65        | 0.19        | OUM <sub>loc3c</sub>      | -367.24        | 22.20       | 0.00        |
| OUM <sub>loc4</sub>        | -360.58        | 2.16        | 0.21        | OUM <sub>loc4</sub>        | -352.42        | 1.29        | 0.23        | <b>OUM<sub>loc4</sub></b> | <b>-389.44</b> | <b>0.00</b> | <b>0.84</b> |

| ppw                  | fit            | delta       | w           | ipl                       | fit            | delta       | w           |
|----------------------|----------------|-------------|-------------|---------------------------|----------------|-------------|-------------|
| BM1                  | -290.73        | 53.24       | 0.00        | BM1                       | -221.03        | 111.43      | 0.00        |
| <b>OU1</b>           | <b>-343.97</b> | <b>0.00</b> | <b>0.51</b> | OU1                       | -219.46        | 113.00      | 0.00        |
| OUM <sub>loc3a</sub> | -340.07        | 3.90        | 0.07        | OUM <sub>loc3a</sub>      | -296.07        | 36.39       | 0.00        |
| OUM <sub>loc3b</sub> | -342.91        | 1.05        | 0.30        | OUM <sub>loc3b</sub>      | -323.22        | 9.24        | 0.01        |
| OUM <sub>loc3c</sub> | -339.40        | 4.56        | 0.05        | OUM <sub>loc3c</sub>      | -317.39        | 15.07       | 0.00        |
| OUM <sub>loc4</sub>  | -339.78        | 4.18        | 0.06        | <b>OUM<sub>loc4</sub></b> | <b>-332.46</b> | <b>0.00</b> | <b>0.99</b> |

### b. hind limb

| fbl                       | fit            | delta       | w           | fdw                        | fit            | delta       | w           | fl                        | fit            | delta       | w           |
|---------------------------|----------------|-------------|-------------|----------------------------|----------------|-------------|-------------|---------------------------|----------------|-------------|-------------|
| BM1                       | -314.06        | 34.02       | 0.00        | BM1                        | -459.10        | 93.67       | 0.00        | BM1                       | -390.02        | 37.29       | 0.00        |
| OU1                       | -341.05        | 7.03        | 0.02        | OU1                        | -533.90        | 18.87       | 0.00        | OU1                       | -408.25        | 19.06       | 0.00        |
| OUM <sub>loc3a</sub>      | -340.55        | 7.53        | 0.01        | OUM <sub>loc3a</sub>       | -549.84        | 2.93        | 0.10        | OUM <sub>loc3a</sub>      | -425.56        | 1.75        | 0.28        |
| OUM <sub>loc3b</sub>      | -344.93        | 3.15        | 0.13        | OUM <sub>loc3b</sub>       | -551.60        | 1.17        | 0.23        | OUM <sub>loc3b</sub>      | -421.54        | 5.77        | 0.04        |
| OUM <sub>loc3c</sub>      | -346.23        | 1.86        | 0.24        | <b>OUM<sub>loc3c</sub></b> | <b>-552.77</b> | <b>0.00</b> | <b>0.42</b> | OUM <sub>loc3c</sub>      | -416.18        | 11.13       | 0.00        |
| <b>OUM<sub>loc4</sub></b> | <b>-348.08</b> | <b>0.00</b> | <b>0.60</b> | OUM <sub>loc4</sub>        | -551.80        | 0.97        | 0.26        | <b>OUM<sub>loc4</sub></b> | <b>-427.31</b> | <b>0.00</b> | <b>0.68</b> |

| fsw                        | fit            | delta       | w           | il                         | fit            | delta       | w           | ipxl                       | fit            | delta       | w           |
|----------------------------|----------------|-------------|-------------|----------------------------|----------------|-------------|-------------|----------------------------|----------------|-------------|-------------|
| BM1                        | -413.39        | 83.94       | 0.00        | BM1                        | -425.75        | 51.39       | 0.00        | BM1                        | -95.48         | 97.23       | 0.00        |
| OU1                        | -488.60        | 8.74        | 0.01        | OU1                        | -468.39        | 8.75        | 0.01        | OU1                        | -182.86        | 9.84        | 0.00        |
| <b>OUM<sub>loc3a</sub></b> | <b>-497.33</b> | <b>0.00</b> | <b>0.52</b> | OUM <sub>loc3a</sub>       | -471.22        | 5.93        | 0.03        | OUM <sub>loc3a</sub>       | -191.41        | 1.30        | 0.27        |
| OUM <sub>loc3b</sub>       | -492.90        | 4.43        | 0.06        | <b>OUM<sub>loc3b</sub></b> | <b>-477.14</b> | <b>0.00</b> | <b>0.52</b> | <b>OUM<sub>loc3b</sub></b> | <b>-192.70</b> | <b>0.00</b> | <b>0.51</b> |
| OUM <sub>loc3c</sub>       | -495.90        | 1.44        | 0.26        | OUM <sub>loc3c</sub>       | -473.59        | 3.55        | 0.09        | OUM <sub>loc3c</sub>       | -186.99        | 5.72        | 0.03        |
| OUM <sub>loc4</sub>        | -494.89        | 2.44        | 0.16        | OUM <sub>loc4</sub>        | -476.37        | 0.77        | 0.36        | OUM <sub>loc4</sub>        | -190.67        | 2.04        | 0.19        |

| isl                        | fit            | delta       | w           | mtl                        | fit            | delta       | w           | mtw                        | fit            | delta       | w           |
|----------------------------|----------------|-------------|-------------|----------------------------|----------------|-------------|-------------|----------------------------|----------------|-------------|-------------|
| BM1                        | -357.04        | 60.19       | 0.00        | BM1                        | -232.90        | 17.42       | 0.00        | BM1                        | -87.72         | 144.14      | 0.00        |
| OU1                        | -392.70        | 24.54       | 0.00        | OU1                        | -243.85        | 6.47        | 0.02        | OU1                        | -215.33        | 16.52       | 0.00        |
| OUM <sub>loc3a</sub>       | -412.19        | 5.04        | 0.06        | OUM <sub>loc3a</sub>       | -249.63        | 0.69        | 0.31        | <b>OUM<sub>loc3a</sub></b> | <b>-231.86</b> | <b>0.00</b> | <b>0.50</b> |
| <b>OUM<sub>loc3b</sub></b> | <b>-417.23</b> | <b>0.00</b> | <b>0.71</b> | <b>OUM<sub>loc3b</sub></b> | <b>-250.32</b> | <b>0.00</b> | <b>0.44</b> | OUM <sub>loc3b</sub>       | -230.38        | 1.47        | 0.24        |
| OUM <sub>loc3c</sub>       | -411.63        | 5.60        | 0.04        | OUM <sub>loc3c</sub>       | -246.06        | 4.26        | 0.05        | OUM <sub>loc3c</sub>       | -226.54        | 5.31        | 0.04        |
| OUM <sub>loc4</sub>        | -414.57        | 2.67        | 0.19        | OUM <sub>loc4</sub>        | -248.60        | 1.72        | 0.18        | OUM <sub>loc4</sub>        | -230.20        | 1.65        | 0.22        |

  

| pel                        | fit            | delta       | w           | ppxl                 | fit            | delta       | w           | ppxw                       | fit            | delta       | w           |
|----------------------------|----------------|-------------|-------------|----------------------|----------------|-------------|-------------|----------------------------|----------------|-------------|-------------|
| BM1                        | -437.41        | 62.83       | 0.00        | BM1                  | -257.05        | 21.01       | 0.00        | BM1                        | -161.50        | 131.90      | 0.00        |
| OU1                        | -483.10        | 17.14       | 0.00        | <b>OU1</b>           | <b>-278.06</b> | <b>0.00</b> | <b>0.42</b> | OU1                        | -288.94        | 4.46        | 0.04        |
| OUM <sub>loc3a</sub>       | -491.45        | 8.79        | 0.01        | OUM <sub>loc3a</sub> | -276.13        | 1.93        | 0.16        | <b>OUM<sub>loc3a</sub></b> | <b>-293.40</b> | <b>0.00</b> | <b>0.36</b> |
| OUM <sub>loc3b</sub>       | -499.65        | 0.59        | 0.35        | OUM <sub>loc3b</sub> | -276.53        | 1.53        | 0.20        | OUM <sub>loc3b</sub>       | -293.32        | 0.08        | 0.35        |
| <b>OUM<sub>loc3c</sub></b> | <b>-500.24</b> | <b>0.00</b> | <b>0.48</b> | OUM <sub>loc3c</sub> | -274.98        | 3.08        | 0.09        | OUM <sub>loc3c</sub>       | -291.10        | 2.30        | 0.11        |
| OUM <sub>loc4</sub>        | -498.11        | 2.13        | 0.16        | OUM <sub>loc4</sub>  | -275.79        | 2.27        | 0.13        | OUM <sub>loc4</sub>        | -291.43        | 1.97        | 0.14        |

  

| tl                        | fit            | delta       | w           | tmw                  | fit            | delta       | w           | tpw                        | fit            | delta       | w           |
|---------------------------|----------------|-------------|-------------|----------------------|----------------|-------------|-------------|----------------------------|----------------|-------------|-------------|
| BM1                       | -364.70        | 22.93       | 0.00        | BM1                  | -309.05        | 78.44       | 0.00        | BM1                        | -352.62        | 108.62      | 0.00        |
| OU1                       | -382.77        | 4.86        | 0.03        | <b>OU1</b>           | <b>-387.49</b> | <b>0.00</b> | <b>0.46</b> | OU1                        | -449.69        | 11.56       | 0.00        |
| OUM <sub>loc3a</sub>      | -387.32        | 0.31        | 0.28        | OUM <sub>loc3a</sub> | -386.13        | 1.36        | 0.23        | OUM <sub>loc3a</sub>       | -459.33        | 1.92        | 0.18        |
| OUM <sub>loc3b</sub>      | -384.09        | 3.54        | 0.06        | OUM <sub>loc3b</sub> | -385.31        | 2.18        | 0.16        | OUM <sub>loc3b</sub>       | -459.65        | 1.60        | 0.22        |
| OUM <sub>loc3c</sub>      | -387.55        | 0.09        | 0.31        | OUM <sub>loc3c</sub> | -384.33        | 3.16        | 0.09        | <b>OUM<sub>loc3c</sub></b> | <b>-461.25</b> | <b>0.00</b> | <b>0.48</b> |
| <b>OUM<sub>loc4</sub></b> | <b>-387.63</b> | <b>0.00</b> | <b>0.33</b> | OUM <sub>loc4</sub>  | -383.24        | 4.26        | 0.05        | OUM <sub>loc4</sub>        | -458.45        | 2.79        | 0.12        |

**Table S3: Optima and bootstrapping results for best-supported OUM model.** We bootstrapped traits with supported OUM models and excluded traits with supported OUM1 (proximal phalanx width, tibia midshaft width, pedal proximal phalanx length) for the a) forelimb and b) hind limbs. Trait abbreviations are explained in Figure S1 and table S1.

**a. forelimb mean  $\Theta$  values and 95% confidence intervals for 13 traits (1 excluded) for the best supported model.**

| <b>sl</b> | <b>OUM<sub>inc3b</sub></b> | <b>optima</b> | <b>L95</b> | <b>U95</b> |
|-----------|----------------------------|---------------|------------|------------|
| ground    |                            | 0.58          | 0.56       | 0.60       |
| arb+glide |                            | 0.59          | 0.57       | 0.61       |
| fly       |                            | 0.67          | 0.64       | 0.71       |

  

| <b>sh</b> | <b>OUM<sub>inc4</sub></b> | <b>optima</b> | <b>L95</b> | <b>U95</b> |
|-----------|---------------------------|---------------|------------|------------|
| ground    |                           | 0.30          | 0.28       | 0.33       |
| arb.      |                           | 0.32          | 0.28       | 0.35       |
| glide     |                           | 0.24          | 0.15       | 0.33       |
| fly       |                           | 0.51          | 0.46       | 0.57       |

  

| <b>hl</b> | <b>OUM<sub>inc4</sub></b> | <b>optima</b> | <b>L95</b> | <b>U95</b> |
|-----------|---------------------------|---------------|------------|------------|
| ground    |                           | 0.63          | 0.61       | 0.66       |
| arb.      |                           | 0.74          | 0.70       | 0.77       |
| glide     |                           | 0.93          | 0.83       | 1.03       |
| fly       |                           | 1.10          | 1.03       | 1.16       |

  

| <b>hdw</b> | <b>OUM<sub>inc3b</sub></b> | <b>optima</b> | <b>L95</b> | <b>U95</b> |
|------------|----------------------------|---------------|------------|------------|
| ground     |                            | 0.09          | 0.06       | 0.13       |
| arb+glide  |                            | 0.15          | 0.10       | 0.20       |
| fly        |                            | 0.22          | 0.14       | 0.31       |

  

| <b>hsw</b> | <b>OUM<sub>inc3b</sub></b> | <b>optima</b> | <b>L95</b> | <b>U95</b> |
|------------|----------------------------|---------------|------------|------------|
| ground     |                            | -0.40         | -0.42      | -0.38      |
| arb+glide  |                            | -0.34         | -0.37      | -0.32      |
| fly        |                            | -0.23         | -0.27      | -0.18      |

  

| <b>hpw</b> | <b>OUM<sub>inc3b</sub></b> | <b>optima</b> | <b>L95</b> | <b>U95</b> |
|------------|----------------------------|---------------|------------|------------|
| ground     |                            | 0.01          | -0.01      | 0.03       |
| arb+glide  |                            | 0.01          | -0.01      | 0.03       |
| fly        |                            | 0.18          | 0.14       | 0.22       |

  

| <b>rl</b> | <b>OUM<sub>inc4</sub></b> | <b>optima</b> | <b>L95</b> | <b>U95</b> |
|-----------|---------------------------|---------------|------------|------------|
| ground    |                           | 0.60          | 0.57       | 0.63       |
| arb.      |                           | 0.73          | 0.68       | 0.77       |
| glide     |                           | 1.00          | 0.87       | 1.13       |
| fly       |                           | 1.33          | 1.24       | 1.41       |

  

| <b>ul</b> | <b>OUM<sub>inc4</sub></b> | <b>optima</b> | <b>L95</b> | <b>U95</b> |
|-----------|---------------------------|---------------|------------|------------|
| ground    |                           | 0.71          | 0.69       | 0.73       |
| arb.      |                           | 0.79          | 0.76       | 0.82       |
| glide     |                           | 0.97          | 0.89       | 1.05       |
| fly       |                           | 1.29          | 1.24       | 1.33       |

  

| <b>uol</b> | <b>OUM<sub>inc3a</sub></b> | <b>optima</b> | <b>L95</b> | <b>U95</b> |
|------------|----------------------------|---------------|------------|------------|
| ground     |                            | -0.09         | -0.11      | -0.06      |
| arb.       |                            | -0.18         | -0.22      | -0.15      |
| glide+fly  |                            | -0.28         | -0.33      | -0.23      |

  

| <b>mcl</b> | <b>OUM<sub>inc3c</sub></b> | <b>optima</b> | <b>L95</b> | <b>U95</b> |
|------------|----------------------------|---------------|------------|------------|
| ground+arb |                            | 0.04          | -0.08      | 0.15       |
| glide      |                            | 0.24          | -0.31      | 0.78       |
| fly        |                            | 2.41          | 1.50       | 3.68       |



| <b>mcw</b> | <b>OUM<sub>inc3b</sub></b> | <b>optima</b> | <b>L95</b> | <b>U95</b> |
|------------|----------------------------|---------------|------------|------------|
| ground     |                            | -0.71         | -0.75      | -0.68      |
| arb+glide  |                            | -0.77         | -0.83      | -0.71      |
| fly        |                            | -0.59         | -0.69      | -0.49      |

| <b>ppl</b> | <b>OUM<sub>inc4</sub></b> | <b>optima</b> | <b>L95</b> | <b>U95</b> |
|------------|---------------------------|---------------|------------|------------|
| ground     |                           | -0.22         | -0.28      | -0.17      |
| arb.       |                           | 0.06          | -0.05      | 0.15       |
| glide      |                           | 0.28          | 0.01       | 0.52       |
| <b>fly</b> |                           | 1.14          | 0.83       | 1.39       |

| <b>ipl</b> | <b>OUM<sub>inc4</sub></b> | <b>optima</b> | <b>L95</b> | <b>U95</b> |
|------------|---------------------------|---------------|------------|------------|
| ground     |                           | -0.32         | -0.37      | -0.28      |
| arb.       |                           | -0.13         | -0.21      | -0.06      |
| glide      |                           | 0.17          | -0.05      | 0.38       |
| <b>fly</b> |                           | 1.06          | 0.85       | 1.25       |

**b. hind limb mean  $\Theta$  values and 95% confidence intervals for 13 traits (2 excluded) for the best supported model.**

| <b>fbl</b> | <b>OUM<sub>inc4</sub></b> | <b>optima</b> | <b>L95</b> | <b>U95</b> |
|------------|---------------------------|---------------|------------|------------|
| ground     |                           | 0.76          | 0.72       | 0.80       |
| arb.       |                           | 0.85          | 0.78       | 0.91       |
| glide      |                           | 1.05          | 0.85       | 1.23       |
| fly        |                           | 0.72          | 0.61       | 0.82       |

| <b>fdw</b> | <b>OUM<sub>inc3c</sub></b> | <b>optima</b> | <b>L95</b> | <b>U95</b> |
|------------|----------------------------|---------------|------------|------------|
| ground+arb |                            | 0.06          | 0.05       | 0.07       |
| glide      |                            | 0.03          | -0.02      | 0.08       |
| fly        |                            | -0.05         | -0.09      | -0.01      |

| <b>fl</b> | <b>OUM<sub>inc4</sub></b> | <b>optima</b> | <b>L95</b> | <b>U95</b> |
|-----------|---------------------------|---------------|------------|------------|
| ground    |                           | 0.72          | 0.69       | 0.75       |
| arb.      |                           | 0.85          | 0.79       | 0.89       |
| glide     |                           | 1.01          | 0.87       | 1.14       |
| fly       |                           | 0.86          | 0.78       | 0.94       |

| <b>fsw</b> | <b>OUM<sub>inc3a</sub></b> | <b>optima</b> | <b>L95</b> | <b>U95</b> |
|------------|----------------------------|---------------|------------|------------|
| ground     |                            | -0.29         | -0.31      | -0.27      |
| arb.       |                            | -0.29         | -0.31      | -0.26      |
| glide+fly  |                            | -0.36         | -0.40      | -0.33      |

| <b>il</b> | <b>OUM<sub>inc3b</sub></b> | <b>optima</b> | <b>L95</b> | <b>U95</b> |
|-----------|----------------------------|---------------|------------|------------|
| ground    |                            | 0.54          | 0.51       | 0.56       |
| arb+glide |                            | 0.59          | 0.56       | 0.62       |
| fly       |                            | 0.45          | 0.39       | 0.51       |

| <b>ipxl</b> | <b>OUM<sub>inc3b</sub></b> | <b>optima</b> | <b>L95</b> | <b>U95</b> |
|-------------|----------------------------|---------------|------------|------------|
| ground      |                            | -0.20         | -0.24      | -0.17      |
| arb+glide   |                            | -0.12         | -0.16      | -0.08      |
| fly         |                            | -0.05         | -0.13      | 0.03       |

| <b>mtl</b> | <b>OUM<sub>inc3b</sub></b> | <b>optima</b> | <b>L95</b> | <b>U95</b> |
|------------|----------------------------|---------------|------------|------------|
| ground     |                            | 0.37          | 0.27       | 0.48       |

| <b>isl</b> | <b>OUM<sub>inc3b</sub></b> | <b>optima</b> | <b>L95</b> | <b>U95</b> |
|------------|----------------------------|---------------|------------|------------|
| ground     |                            | 0.37          | 0.35       | 0.40       |
| arb+glide  |                            | 0.31          | 0.28       | 0.35       |
| fly        |                            | 0.13          | 0.07       | 0.20       |

| <b>mtw</b> | <b>OUM<sub>inc3a</sub></b> | <b>optima</b> | <b>L95</b> | <b>U95</b> |
|------------|----------------------------|---------------|------------|------------|
| ground     |                            | -0.64         | -0.67      | -0.61      |
| arb.       |                            | -0.71         | -0.75      | -0.67      |
| glide+fly  |                            | -0.79         | -0.84      | -0.73      |

| <b>ppxw</b> | <b>OUM<sub>inc3a</sub></b> | <b>optima</b> | <b>L95</b> | <b>U95</b> |
|-------------|----------------------------|---------------|------------|------------|
| ground      |                            | -0.69         | -0.72      | -0.67      |
| arb.        |                            | -0.73         | -0.77      | -0.70      |
| glide+fly   |                            | -0.77         | -0.82      | -0.72      |

| <b>tpw</b> | <b>OUM<sub>inc3c</sub></b> | <b>optima</b> | <b>L95</b> | <b>U95</b> |
|------------|----------------------------|---------------|------------|------------|
| ground+arb |                            | 0.05          | 0.03       | 0.06       |
| glide      |                            | 0.01          | -0.04      | 0.06       |
| fly        |                            | -0.04         | -0.08      | 0.00       |

|           |       |       |      |
|-----------|-------|-------|------|
| arb+glide | 0.17  | 0.05  | 0.32 |
| fly       | -0.03 | -0.28 | 0.25 |

| <b>pel</b> | <b>OUM<sub>inc3c</sub></b> | <b>optima</b> | <b>L95</b> | <b>U95</b> |
|------------|----------------------------|---------------|------------|------------|
| ground+arb |                            | 0.77          | 0.76       | 0.79       |
| glide      |                            | 0.79          | 0.71       | 0.87       |
| fly        |                            | 0.62          | 0.57       | 0.67       |

| <b>tl</b> | <b>OUM<sub>inc4</sub></b> | <b>optima</b> | <b>L95</b> | <b>U95</b> |
|-----------|---------------------------|---------------|------------|------------|
| ground    |                           | 0.79          | 0.74       | 0.83       |
| arb.      |                           | 0.86          | 0.78       | 0.93       |
| glide     |                           | 1.09          | 0.86       | 1.28       |
| fly       |                           | 0.89          | 0.76       | 1.00       |

**Table S4: Statistical results for model fitting analyses on the extant+extinct dataset.** Comparisons of the best-fitting OUM models (bolded) using AICc scores to assess fit and AICcW weights to assess relative model support for a) 14 forelimb traits and b) 15 hind limb traits. We fit all models using functions in the *OUwie R* package. Trait abbreviations are explained in table S1.

a. Forelimb

| hdw                        | fit            | delta    | w           | hl                        | fit            | delta    | w           | hpw                        | fit            | delta    | w           |
|----------------------------|----------------|----------|-------------|---------------------------|----------------|----------|-------------|----------------------------|----------------|----------|-------------|
| BM1                        | -414.31        | 36.66    | 0           | BM1                       | -414.17        | 87.35    | 0           | BM1                        | -469.58        | 89.9     | 0           |
| OU1                        | -448.77        | 2.2      | 0.14        | OU1                       | -435.55        | 65.97    | 0           | OU1                        | -523.52        | 35.96    | 0           |
| OUM <sub>Ioc3a</sub>       | -448.46        | 2.51     | 0.12        | OUM <sub>Ioc3a</sub>      | -489.84        | 11.68    | 0           | <b>OUM<sub>Ioc3a</sub></b> | <b>-559.48</b> | <b>0</b> | <b>0.35</b> |
| <b>OUM<sub>Ioc3b</sub></b> | <b>-450.97</b> | <b>0</b> | <b>0.41</b> | OUM <sub>Ioc3b</sub>      | -489.51        | 12.01    | 0           | OUM <sub>Ioc3b</sub>       | -559           | 0.48     | 0.27        |
| OUM <sub>Ioc3c</sub>       | -448.86        | 2.11     | 0.14        | OUM <sub>Ioc3c</sub>      | -490.29        | 11.23    | 0           | OUM <sub>Ioc3c</sub>       | -558.82        | 0.66     | 0.25        |
| OUM <sub>Ioc4</sub>        | -449.54        | 1.43     | 0.2         | <b>OUM<sub>Ioc4</sub></b> | <b>-501.52</b> | <b>0</b> | <b>0.99</b> | OUM <sub>Ioc4</sub>        | -557.53        | 1.95     | 0.13        |

  

| hsw                        | fit            | delta    | w           | ipl                       | fit            | delta    | w          | mcl                        | fit            | delta    | w           |
|----------------------------|----------------|----------|-------------|---------------------------|----------------|----------|------------|----------------------------|----------------|----------|-------------|
| BM1                        | -364           | 72.66    | 0           | BM1                       | -182.49        | 106.48   | 0          | BM1                        | -292.42        | 53.72    | 0           |
| OU1                        | -416.5         | 20.17    | 0           | OU1                       | -191.73        | 97.24    | 0          | OU1                        | -295.49        | 50.65    | 0           |
| OUM <sub>Ioc3a</sub>       | -430.17        | 6.5      | 0.03        | OUM <sub>Ioc3a</sub>      | -280.35        | 8.62     | 0.01       | OUM <sub>Ioc3a</sub>       | -340.94        | 5.2      | 0.04        |
| <b>OUM<sub>Ioc3b</sub></b> | <b>-436.67</b> | <b>0</b> | <b>0.66</b> | OUM <sub>Ioc3b</sub>      | -283.97        | 5        | 0.07       | <b>OUM<sub>Ioc3b</sub></b> | <b>-346.14</b> | <b>0</b> | <b>0.58</b> |
| OUM <sub>Ioc3c</sub>       | -429.92        | 6.74     | 0.02        | OUM <sub>Ioc3c</sub>      | -281.14        | 7.83     | 0.02       | OUM <sub>Ioc3c</sub>       | -345.19        | 0.95     | 0.36        |
| OUM <sub>Ioc4</sub>        | -435.04        | 1.63     | 0.29        | <b>OUM<sub>Ioc4</sub></b> | <b>-288.97</b> | <b>0</b> | <b>0.9</b> | OUM <sub>Ioc4</sub>        | -338.44        | 7.7      | 0.01        |

  

| mcw                        | fit            | delta    | w          | ppl                       | fit           | delta    | w           | ppw                  | fit            | delta    | w           |
|----------------------------|----------------|----------|------------|---------------------------|---------------|----------|-------------|----------------------|----------------|----------|-------------|
| BM1                        | -319.17        | 40.19    | 0          | BM1                       | -299.33       | 74.17    | 0           | BM1                  | -305.14        | 47.54    | 0           |
| OU1                        | -356.63        | 2.74     | 0.1        | OU1                       | -300.18       | 73.32    | 0           | <b>OU1</b>           | <b>-352.68</b> | <b>0</b> | <b>0.55</b> |
| OUM <sub>Ioc3a</sub>       | -357.84        | 1.52     | 0.19       | OUM <sub>Ioc3a</sub>      | -351.81       | 21.69    | 0           | OUM <sub>Ioc3a</sub> | -348.69        | 3.99     | 0.08        |
| <b>OUM<sub>Ioc3b</sub></b> | <b>-359.36</b> | <b>0</b> | <b>0.4</b> | OUM <sub>Ioc3b</sub>      | -372.28       | 1.22     | 0.35        | OUM <sub>Ioc3b</sub> | -350.86        | 1.82     | 0.22        |
| OUM <sub>Ioc3c</sub>       | -357.69        | 1.67     | 0.17       | OUM <sub>Ioc3c</sub>      | -351.11       | 22.39    | 0           | OUM <sub>Ioc3c</sub> | -349.03        | 3.65     | 0.09        |
| OUM <sub>Ioc4</sub>        | -357.2         | 2.16     | 0.14       | <b>OUM<sub>Ioc4</sub></b> | <b>-373.5</b> | <b>0</b> | <b>0.65</b> | OUM <sub>Ioc4</sub>  | -348.13        | 4.55     | 0.06        |

  

| rl                   | fit     | delta | w | sh                         | fit            | delta    | w           | sl                         | fit            | delta    | w           |
|----------------------|---------|-------|---|----------------------------|----------------|----------|-------------|----------------------------|----------------|----------|-------------|
| BM1                  | -357.08 | 83.62 | 0 | BM1                        | -315.44        | 89.03    | 0           | BM1                        | -393.8         | 133.47   | 0           |
| OU1                  | -365.86 | 74.84 | 0 | OU1                        | -376.83        | 27.64    | 0           | OU1                        | -506.44        | 20.83    | 0           |
| OUM <sub>Ioc3a</sub> | -427.88 | 12.82 | 0 | <b>OUM<sub>Ioc3a</sub></b> | <b>-404.47</b> | <b>0</b> | <b>0.42</b> | OUM <sub>Ioc3a</sub>       | -526.78        | 0.49     | 0.26        |
| OUM <sub>Ioc3b</sub> | -427    | 13.7  | 0 | OUM <sub>Ioc3b</sub>       | -401.68        | 2.79     | 0.1         | <b>OUM<sub>Ioc3b</sub></b> | <b>-527.27</b> | <b>0</b> | <b>0.33</b> |

|                           |               |          |             |                      |         |      |      |                      |         |      |     |
|---------------------------|---------------|----------|-------------|----------------------|---------|------|------|----------------------|---------|------|-----|
| OUM <sub>loc3c</sub>      | -429.04       | 11.66    | 0           | OUM <sub>loc3c</sub> | -403.43 | 1.04 | 0.25 | OUM <sub>loc3c</sub> | -527.05 | 0.22 | 0.3 |
| <b>OUM<sub>loc4</sub></b> | <b>-440.7</b> | <b>0</b> | <b>0.99</b> | OUM <sub>loc4</sub>  | -403.29 | 1.19 | 0.23 | OUM <sub>loc4</sub>  | -524.93 | 2.34 | 0.1 |

| ul                        | fit            | delta    | w        | uol                       | fit            | delta    | w           |
|---------------------------|----------------|----------|----------|---------------------------|----------------|----------|-------------|
| BM1                       | -401.44        | 124.63   | 0        | BM1                       | -264.02        | 82.47    | 0           |
| OU1                       | -409.77        | 116.3    | 0        | OU1                       | -314.8         | 31.69    | 0           |
| OUM <sub>loc3a</sub>      | -509.25        | 16.82    | 0        | OUM <sub>loc3a</sub>      | -334.21        | 12.28    | 0           |
| OUM <sub>loc3b</sub>      | -498.37        | 27.7     | 0        | OUM <sub>loc3b</sub>      | -345.14        | 1.35     | 0.34        |
| OUM <sub>loc3c</sub>      | -502.25        | 23.82    | 0        | OUM <sub>loc3c</sub>      | -333.88        | 12.6     | 0           |
| <b>OUM<sub>loc4</sub></b> | <b>-526.07</b> | <b>0</b> | <b>1</b> | <b>OUM<sub>loc4</sub></b> | <b>-346.49</b> | <b>0</b> | <b>0.66</b> |

b. Hind limb

| fbl                       | fit            | delta    | w           | fdw                        | fit            | delta    | w           | fl                        | fit            | delta    | w           |
|---------------------------|----------------|----------|-------------|----------------------------|----------------|----------|-------------|---------------------------|----------------|----------|-------------|
| BM1                       | -336.31        | 24.84    | 0           | BM1                        | -464.14        | 95.9     | 0           | BM1                       | -399.43        | 34.99    | 0           |
| OU1                       | -356.4         | 4.76     | 0.05        | OU1                        | -536.38        | 23.66    | 0           | OU1                       | -417.78        | 16.64    | 0           |
| OUM <sub>loc3a</sub>      | -355.13        | 6.03     | 0.03        | OUM <sub>loc3a</sub>       | -556.29        | 3.75     | 0.06        | OUM <sub>loc3a</sub>      | -431.38        | 3.03     | 0.17        |
| OUM <sub>loc3b</sub>      | -357.8         | 3.35     | 0.11        | OUM <sub>loc3b</sub>       | -559.52        | 0.52     | 0.29        | OUM <sub>loc3b</sub>      | -429.49        | 4.93     | 0.06        |
| OUM <sub>loc3c</sub>      | -359.53        | 1.62     | 0.25        | <b>OUM<sub>loc3c</sub></b> | <b>-560.04</b> | <b>0</b> | <b>0.37</b> | OUM <sub>loc3c</sub>      | -423.86        | 10.56    | 0           |
| <b>OUM<sub>loc4</sub></b> | <b>-361.15</b> | <b>0</b> | <b>0.56</b> | OUM <sub>loc4</sub>        | -559.46        | 0.58     | 0.28        | <b>OUM<sub>loc4</sub></b> | <b>-434.41</b> | <b>0</b> | <b>0.76</b> |

| fsw                        | fit            | delta    | w           | il                         | fit            | delta    | w           | ipxl                       | fit            | delta    | w           |
|----------------------------|----------------|----------|-------------|----------------------------|----------------|----------|-------------|----------------------------|----------------|----------|-------------|
| BM1                        | -419.08        | 80.97    | 0           | BM1                        | -428.09        | 50.06    | 0           | BM1                        | -99.84         | 97.13    | 0           |
| OU1                        | -492.23        | 7.83     | 0.01        | OU1                        | -471.26        | 6.89     | 0.02        | OU1                        | -186.3         | 10.67    | 0           |
| <b>OUM<sub>loc3a</sub></b> | <b>-500.05</b> | <b>0</b> | <b>0.42</b> | OUM <sub>loc3a</sub>       | -473.08        | 5.06     | 0.04        | OUM <sub>loc3a</sub>       | -195.94        | 1.03     | 0.28        |
| OUM <sub>loc3b</sub>       | -496.49        | 3.57     | 0.07        | <b>OUM<sub>loc3b</sub></b> | <b>-478.15</b> | <b>0</b> | <b>0.54</b> | <b>OUM<sub>loc3b</sub></b> | <b>-196.97</b> | <b>0</b> | <b>0.47</b> |
| OUM <sub>loc3c</sub>       | -499.82        | 0.24     | 0.37        | OUM <sub>loc3c</sub>       | -474.07        | 4.08     | 0.07        | OUM <sub>loc3c</sub>       | -191.71        | 5.26     | 0.03        |
| OUM <sub>loc4</sub>        | -497.82        | 2.23     | 0.14        | OUM <sub>loc4</sub>        | -477.21        | 0.94     | 0.34        | OUM <sub>loc4</sub>        | -195.29        | 1.68     | 0.2         |

| isl                        | fit            | delta    | w           | mtl                        | fit            | delta    | w           | pel                        | fit            | delta    | w           |
|----------------------------|----------------|----------|-------------|----------------------------|----------------|----------|-------------|----------------------------|----------------|----------|-------------|
| BM1                        | -362.54        | 59.58    | 0           | BM1                        | -234.47        | 15.71    | 0           | BM1                        | -446.28        | 59.11    | 0           |
| OU1                        | -393.96        | 28.16    | 0           | OU1                        | -244.72        | 5.46     | 0.03        | OU1                        | -489.28        | 16.11    | 0           |
| OUM <sub>loc3a</sub>       | -416.29        | 5.82     | 0.04        | OUM <sub>loc3a</sub>       | -249.61        | 0.57     | 0.35        | OUM <sub>loc3a</sub>       | -498.44        | 6.94     | 0.01        |
| <b>OUM<sub>loc3b</sub></b> | <b>-422.12</b> | <b>0</b> | <b>0.76</b> | <b>OUM<sub>loc3b</sub></b> | <b>-250.18</b> | <b>0</b> | <b>0.46</b> | <b>OUM<sub>loc3b</sub></b> | <b>-505.38</b> | <b>0</b> | <b>0.43</b> |
| OUM <sub>loc3c</sub>       | -415.33        | 6.79     | 0.03        | OUM <sub>loc3c</sub>       | -244.74        | 5.45     | 0.03        | OUM <sub>loc3c</sub>       | -505.19        | 0.2      | 0.39        |
| OUM <sub>loc4</sub>        | -419.17        | 2.94     | 0.17        | OUM <sub>loc4</sub>        | -247.6         | 2.58     | 0.13        | OUM <sub>loc4</sub>        | -503.58        | 1.81     | 0.17        |

| tl                        | fit            | delta    | w           | tmw                  | fit            | delta    | w           | tpw                        | fit            | delta    | w           |
|---------------------------|----------------|----------|-------------|----------------------|----------------|----------|-------------|----------------------------|----------------|----------|-------------|
| BM1                       | -370.43        | 22.64    | 0           | BM1                  | -300.03        | 85.01    | 0           | BM1                        | -358.46        | 107.88   | 0           |
| OU1                       | -388.18        | 4.9      | 0.04        | <b>OU1</b>           | <b>-385.04</b> | <b>0</b> | <b>0.44</b> | OU1                        | -450.83        | 15.52    | 0           |
| OUM <sub>loc3a</sub>      | -391.47        | 1.6      | 0.19        | OUM <sub>loc3a</sub> | -383.38        | 1.66     | 0.19        | OUM <sub>loc3a</sub>       | -464.22        | 2.13     | 0.16        |
| OUM <sub>loc3b</sub>      | -389.18        | 3.9      | 0.06        | OUM <sub>loc3b</sub> | -383.46        | 1.58     | 0.2         | OUM <sub>loc3b</sub>       | -464.86        | 1.49     | 0.22        |
| OUM <sub>loc3c</sub>      | -392.24        | 0.83     | 0.28        | OUM <sub>loc3c</sub> | -382           | 3.04     | 0.1         | <b>OUM<sub>loc3c</sub></b> | <b>-466.35</b> | <b>0</b> | <b>0.46</b> |
| <b>OUM<sub>loc4</sub></b> | <b>-393.07</b> | <b>0</b> | <b>0.43</b> | OUM <sub>loc4</sub>  | -381.33        | 3.71     | 0.07        | OUM <sub>loc4</sub>        | -464.32        | 2.03     | 0.17        |

  

| ppxw                       | fit            | delta    | w           | ppxl                 | fit            | delta    | w           | mtw                        | fit            | delta    | w           |
|----------------------------|----------------|----------|-------------|----------------------|----------------|----------|-------------|----------------------------|----------------|----------|-------------|
| BM1                        | -153.48        | 136.46   | 0           | BM1                  | -253.68        | 22.28    | 0           | BM1                        | -72.59         | 160.39   | 0           |
| OU1                        | -283.09        | 6.86     | 0.01        | <b>OU1</b>           | <b>-275.97</b> | <b>0</b> | <b>0.44</b> | OU1                        | -212.33        | 20.65    | 0           |
| <b>OUM<sub>loc3a</sub></b> | <b>-289.94</b> | <b>0</b> | <b>0.39</b> | OUM <sub>loc3a</sub> | -274.31        | 1.66     | 0.19        | <b>OUM<sub>loc3a</sub></b> | <b>-232.98</b> | <b>0</b> | <b>0.58</b> |
| OUM <sub>loc3b</sub>       | -289.66        | 0.28     | 0.34        | OUM <sub>loc3b</sub> | -274.44        | 1.53     | 0.2         | OUM <sub>loc3b</sub>       | -230.79        | 2.19     | 0.19        |
| OUM <sub>loc3c</sub>       | -287.42        | 2.52     | 0.11        | OUM <sub>loc3c</sub> | -272.48        | 3.48     | 0.08        | OUM <sub>loc3c</sub>       | -226.85        | 6.13     | 0.03        |
| OUM <sub>loc4</sub>        | -288.12        | 1.82     | 0.16        | OUM <sub>loc4</sub>  | -272.94        | 3.02     | 0.1         | OUM <sub>loc4</sub>        | -230.89        | 2.09     | 0.2         |

**Table S5: Optima values for the best-fitting OUM model results for extant+extinct dataset.** Bootstrapping did not perform well on this dataset, so here we include only the model optima values with upper and lower 95% confidence intervals for a) forelimb traits and b) hind limb traits. We excluded traits only supported by an OU1 model (proximal phalanx width and pedal proximal phalanx length). Trait abbreviations are explained in Figure S1 and table S1.

**a. forelimb**

| <b>sl</b> | <b>OUMloc3b optima</b> | <b>L95</b> | <b>U95</b> | <b>sh</b> | <b>OUMloc3a optima</b> | <b>L95</b> | <b>U95</b> |
|-----------|------------------------|------------|------------|-----------|------------------------|------------|------------|
| ground    | 0.58                   | 0.58       | 0.58       | ground    | 0.31                   | 0.31       | 0.31       |
| arb+glide | 0.59                   | 0.59       | 0.59       | arb.      | 0.24                   | 0.23       | 0.26       |
| fly       | 0.68                   | 0.68       | 0.68       | glide+fly | 0.50                   | 0.50       | 0.51       |

  

| <b>uol</b> | <b>OUMloc4 optima</b> | <b>L95</b> | <b>U95</b> | <b>hdw</b>   | <b>OUMloc3b optima</b> | <b>L95</b> | <b>U95</b> |
|------------|-----------------------|------------|------------|--------------|------------------------|------------|------------|
| ground     | -0.09                 | -0.09      | -0.08      | ground       | 0.09                   | 0.07       | 0.11       |
| arb.       | -0.18                 | -0.19      | -0.17      | arb. & glide | 0.15                   | 0.12       | 0.17       |
| glide      | -0.27                 | -0.31      | -0.22      | fly          | 0.21                   | 0.21       | 0.21       |
| fly        | -0.28                 | -0.28      | -0.27      |              |                        |            |            |

  

| <b>hsw</b>   | <b>OUMloc3b optima</b> | <b>L95</b> | <b>U95</b> | <b>hpw</b> | <b>OUMloc3a optima</b> | <b>L95</b> | <b>U95</b> |
|--------------|------------------------|------------|------------|------------|------------------------|------------|------------|
| ground       | -0.40                  | -0.41      | -0.40      | ground     | 0.01                   | 0.01       | 0.01       |
| arb. & glide | -0.35                  | -0.35      | -0.33      | arb.       | 0.00                   | -0.01      | 0.00       |
| fly          | -0.21                  | -0.21      | -0.21      | glide+fly  | 0.19                   | 0.19       | 0.19       |

  

| <b>rl</b> | <b>OUMloc4 optima</b> | <b>L95</b> | <b>U95</b> | <b>ul</b> | <b>OUMloc4 optima</b> | <b>L95</b> | <b>U95</b> |
|-----------|-----------------------|------------|------------|-----------|-----------------------|------------|------------|
| ground    | 0.61                  | 0.60       | 0.62       | ground    | 0.71                  | 0.71       | 0.72       |
| arb.      | 0.72                  | 0.70       | 0.73       | arb.      | 0.79                  | 0.78       | 0.80       |
| glide     | 0.93                  | 0.87       | 1.01       | glide     | 0.94                  | 0.91       | 0.97       |
| fly       | 1.29                  | 1.29       | 1.31       | fly       | 1.29                  | 1.29       | 1.29       |

  

| <b>mcl</b>   | <b>OUMloc3b optima</b> | <b>L95</b> | <b>U95</b> | <b>mcw</b>   | <b>OUMloc3b optima</b> | <b>L95</b> | <b>U95</b> |
|--------------|------------------------|------------|------------|--------------|------------------------|------------|------------|
| ground       | -0.04                  | -0.10      | 0.01       | ground       | -0.72                  | -0.73      | -0.70      |
| arb. & glide | 0.03                   | -0.05      | 0.08       | arb. & glide | -0.77                  | -0.80      | -0.74      |
| fly          | 1.44                   | 1.37       | 1.48       | fly          | -0.60                  | -0.61      | -0.60      |

  

| <b>hl</b> | <b>OUMloc4 optima</b> | <b>L95</b> | <b>U95</b> | <b>ppl</b> | <b>OUMloc4 optima</b> | <b>L95</b> | <b>U95</b> |
|-----------|-----------------------|------------|------------|------------|-----------------------|------------|------------|
| ground    | 0.64                  | 0.63       | 0.64       | ground     | -0.23                 | -0.28      | -0.19      |
| arb.      | 0.73                  | 0.72       | 0.75       | arb.       | 0.04                  | -0.02      | 0.10       |
| glide     | 0.93                  | 0.86       | 0.99       | glide      | 0.24                  | 0.15       | 0.31       |
| fly       | 1.09                  | 1.09       | 1.10       | fly        | 0.92                  | 0.89       | 0.95       |

| <b>ipl</b>    | <b>OUMloc4 optima</b> | <b>L95</b> | <b>U95</b> |
|---------------|-----------------------|------------|------------|
| <b>ground</b> | -0.32                 | -0.34      | -0.30      |
| <b>arb.</b>   | -0.15                 | -0.19      | -0.12      |
| <b>glide</b>  | 0.13                  | 0.02       | 0.22       |
| <b>fly</b>    | 0.95                  | 0.93       | 0.97       |

**b. hind limb**

| <b>pel</b>       | <b>OUMloc4b optima</b> | <b>L95</b> | <b>U95</b> |
|------------------|------------------------|------------|------------|
| <b>ground</b>    | 0.77                   | 0.77       | 0.78       |
| <b>arb+glide</b> | 0.78                   | 0.77       | 0.79       |
| <b>fly</b>       | 0.63                   | 0.63       | 0.63       |

| <b>isl</b>       | <b>OUMloc3b optima</b> | <b>L95</b> | <b>U95</b> |
|------------------|------------------------|------------|------------|
| <b>ground</b>    | 0.38                   | 0.37       | 0.38       |
| <b>arb+glide</b> | 0.31                   | 0.29       | 0.32       |
| <b>fly</b>       | 0.13                   | 0.13       | 0.13       |

| <b>fl</b>     | <b>OUMloc4 optima</b> | <b>L95</b> | <b>U95</b> |
|---------------|-----------------------|------------|------------|
| <b>ground</b> | 0.72                  | 0.71       | 0.73       |
| <b>arb.</b>   | 0.85                  | 0.81       | 0.88       |
| <b>glide</b>  | 1.03                  | 0.98       | 1.12       |
| <b>fly</b>    | 0.86                  | 0.85       | 0.86       |

| <b>fbl</b>    | <b>OUMloc4 optima</b> | <b>L95</b> | <b>U95</b> |
|---------------|-----------------------|------------|------------|
| <b>ground</b> | 0.76                  | 0.74       | 0.77       |
| <b>arb.</b>   | 0.84                  | 0.80       | 0.88       |
| <b>glide</b>  | 1.10                  | 1.03       | 1.21       |
| <b>fly</b>    | 0.71                  | 0.70       | 0.72       |

| <b>mtl</b>       | <b>OUMloc3b optima</b> | <b>L95</b> | <b>U95</b> |
|------------------|------------------------|------------|------------|
| <b>ground</b>    | 0.39                   | 0.36       | 0.43       |
| <b>arb+glide</b> | 0.19                   | 0.12       | 0.25       |
| <b>fly</b>       | 0.09                   | 0.08       | 0.10       |

| <b>ipxl</b>      | <b>optima</b> | <b>L95</b> | <b>U95</b> |
|------------------|---------------|------------|------------|
| <b>ground</b>    | -0.20         | -0.21      | -0.20      |
| <b>arb+glide</b> | -0.12         | -0.13      | -0.12      |
| <b>fly</b>       | -0.05         | -0.05      | -0.05      |

| <b>il</b>        | <b>OUMloc3b optima</b> | <b>L95</b> | <b>U95</b> |
|------------------|------------------------|------------|------------|
| <b>ground</b>    | 0.54                   | 0.53       | 0.55       |
| <b>arb+glide</b> | 0.59                   | 0.57       | 0.60       |
| <b>fly</b>       | 0.46                   | 0.46       | 0.46       |

| <b>fsw</b>       | <b>OUMloc3a optima</b> | <b>L95</b> | <b>U95</b> |
|------------------|------------------------|------------|------------|
| <b>ground</b>    | -0.29                  | -0.29      | -0.29      |
| <b>arb.</b>      | -0.36                  | -0.37      | -0.35      |
| <b>glide+fly</b> | -0.35                  | -0.35      | -0.35      |

| <b>tl</b>     | <b>OUMloc4 optima</b> | <b>L95</b> | <b>U95</b> |
|---------------|-----------------------|------------|------------|
| <b>ground</b> | 0.79                  | 0.77       | 0.80       |
| <b>arb.</b>   | 0.86                  | 0.82       | 0.90       |
| <b>glide</b>  | 1.12                  | 1.04       | 1.23       |
| <b>fly</b>    | 0.88                  | 0.87       | 0.88       |

| <b>tpw</b>        | <b>OUMloc3c optima</b> | <b>L95</b> | <b>U95</b> |
|-------------------|------------------------|------------|------------|
| <b>ground+arb</b> | 0.05                   | 0.05       | 0.05       |
| <b>glide</b>      | 0.01                   | 0.00       | 0.02       |
| <b>fly</b>        | -0.05                  | -0.05      | -0.05      |

| <b>mtw</b>       | <b>OUMloc3a optima</b> | <b>L95</b> | <b>U95</b> |
|------------------|------------------------|------------|------------|
| <b>ground</b>    | -0.64                  | -0.65      | -0.64      |
| <b>arb.</b>      | -0.71                  | -0.72      | -0.70      |
| <b>glide+fly</b> | -0.80                  | -0.80      | -0.79      |

| <b>ppwx</b>      | <b>OUMloc3a optima</b> | <b>L95</b> | <b>U95</b> |
|------------------|------------------------|------------|------------|
| <b>ground</b>    | -0.70                  | -0.70      | -0.69      |
| <b>arb.</b>      | -0.73                  | -0.74      | -0.73      |
| <b>glide+fly</b> | -0.79                  | -0.79      | -0.78      |

| <b>fdw</b>        | <b>OUMloc3c optima</b> | <b>L95</b> | <b>U95</b> |
|-------------------|------------------------|------------|------------|
| <b>ground+arb</b> | 0.06                   | 0.06       | 0.06       |
| <b>glide</b>      | 0.03                   | 0.01       | 0.04       |
| <b>fly</b>        | -0.05                  | -0.05      | -0.05      |



**Table S6.** Fits of multivariate evolutionary models to morphological data of extant+extinct species. A) MvMORPH models were fit to PC1–PC3 scores of a principal component analysis PCA of 29 skeletal traits. B) Optima were extracted from the model, but were physically impossible for the forelimb models so cannot be properly analyzed.

a)

| forelimb                    | fit            | delta       | w           | hind limb                   | fit            | delta       | w           |
|-----------------------------|----------------|-------------|-------------|-----------------------------|----------------|-------------|-------------|
| mvBM1                       | -514.32        | 239.51      | 0.00        | mvBM1                       | -241.16        | 212.95      | 0.00        |
| mvOU1                       | -561.39        | 192.44      | 0.00        | mvOU1                       | -400.68        | 53.43       | 0.00        |
| mvOUM <sub>loc3a</sub>      | -722.22        | 31.60       | 0.00        | mvOUM <sub>loc3a</sub>      | -450.88        | 3.24        | 0.16        |
| mvOUM <sub>loc3b</sub>      | -730.87        | 22.95       | 0.00        | mvOUM <sub>loc3b</sub>      | -447.86        | 6.25        | 0.04        |
| mvOUM <sub>loc3c</sub>      | -712.38        | 41.45       | 0.00        | mvOUM <sub>loc3c</sub>      | -435.10        | 19.01       | 0.00        |
| <b>mvOUM<sub>loc4</sub></b> | <b>-753.83</b> | <b>0.00</b> | <b>1.00</b> | <b>mvOUM<sub>loc4</sub></b> | <b>-454.11</b> | <b>0.00</b> | <b>0.80</b> |

b) PC1 and PC2 optima are formatted as points (PC1, PC2) that could be superimposed on a PCA.

| best supported model                           | ground-dweller<br>optimum | arborealist<br>optimum | glider<br>optimum | bat<br>optimum |
|------------------------------------------------|---------------------------|------------------------|-------------------|----------------|
| forelimb mvMORPH <sub>loc4</sub> PC1 value     | -118.91                   | -100.66                | -55.78            | -6.85          |
| forelimb mvMORPH <sub>loc4</sub> PC2 value     | -256.49                   | -214.10                | -107.61           | -24.24         |
| hind limb mvMORPH <sub>loc4</sub> PC1 value    | 0.03                      | 0.01                   | -0.01             | -0.20          |
| hind limb mvMORPH <sub>loc4</sub> PC2<br>value | 0.03                      | 0.00                   | -0.02             | 0.20           |
